## **Systematic single-variant and gene-based association testing of 3,700 phenotypes in 281,850 UK Biobank exomes**

Konrad J. Karczewski<sup>1</sup>, Matthew Solomonson<sup>1</sup>, Katherine R. Chao<sup>1</sup>, Julia K. Goodrich, Grace Tiao, Wenhan Lu, Bridget M. Riley-Gillis, Ellen A. Tsai, Hye In Kim, Xiuwen Zheng, Fedik Rahimov, Sahar Esmaeeli, A. Jason Grundstad, Mark Reppell, Jeff Waring, Howard Jacob, David Sexton, Paola G. Bronson, Xing Chen, Xinli Hu, Jacqueline I. Goldstein, Daniel King, Christopher Vittal, Timothy Poterba, Duncan S. Palmer, Claire Churchhouse, Daniel P. Howrigan, Wei Zhou, Nicholas A. Watts, Kevin Nguyen, Huy Nguyen, Cara Mason, Christopher Farnham, Charlotte Tolonen, Laura D. Gauthier, Namrata Gupta, Daniel G. MacArthur, Heidi L. Rehm, Cotton Seed, Anthony A. Philippakis, Mark J. Daly, J. Wade Davis<sup>2</sup>, Heiko Runz<sup>3</sup>, Melissa R. Miller<sup>4</sup>, Benjamin M. Neale<sup>1</sup>

This manuscript has been temporarily withdrawn by the authors upon request from UK Biobank. Results supporting this manuscript remain valid and can be found at <https://genebass.org>. The full manuscript will be re-uploaded pending decision by UK Biobank. If you have any questions, please contact the corresponding author.
